# Supplementary material for: From 1D zigzag chains to 3D chiral frameworks: synthesis and properties of praseodymium(iii) and neodymium(iii) coordination polymers
Source: Royal Society of Chemistry journal article supplement (doi:10.1039/c4ra06629d), 2014-08-22
Supplement: c4ra06629d1.pdf [file c4ra06629d1.pdf]

## Supporting Information

### From 1D Zigzag Chains to 3D chiral Frameworks: Synthesis and Properties of Praseodymium(III) and Neodymium(III) Coordination Polymers

Xiaoping Zhang, Na Xu,\* Shiyuan Zhang, Xiaoqing Zhao, and Peng Cheng\*

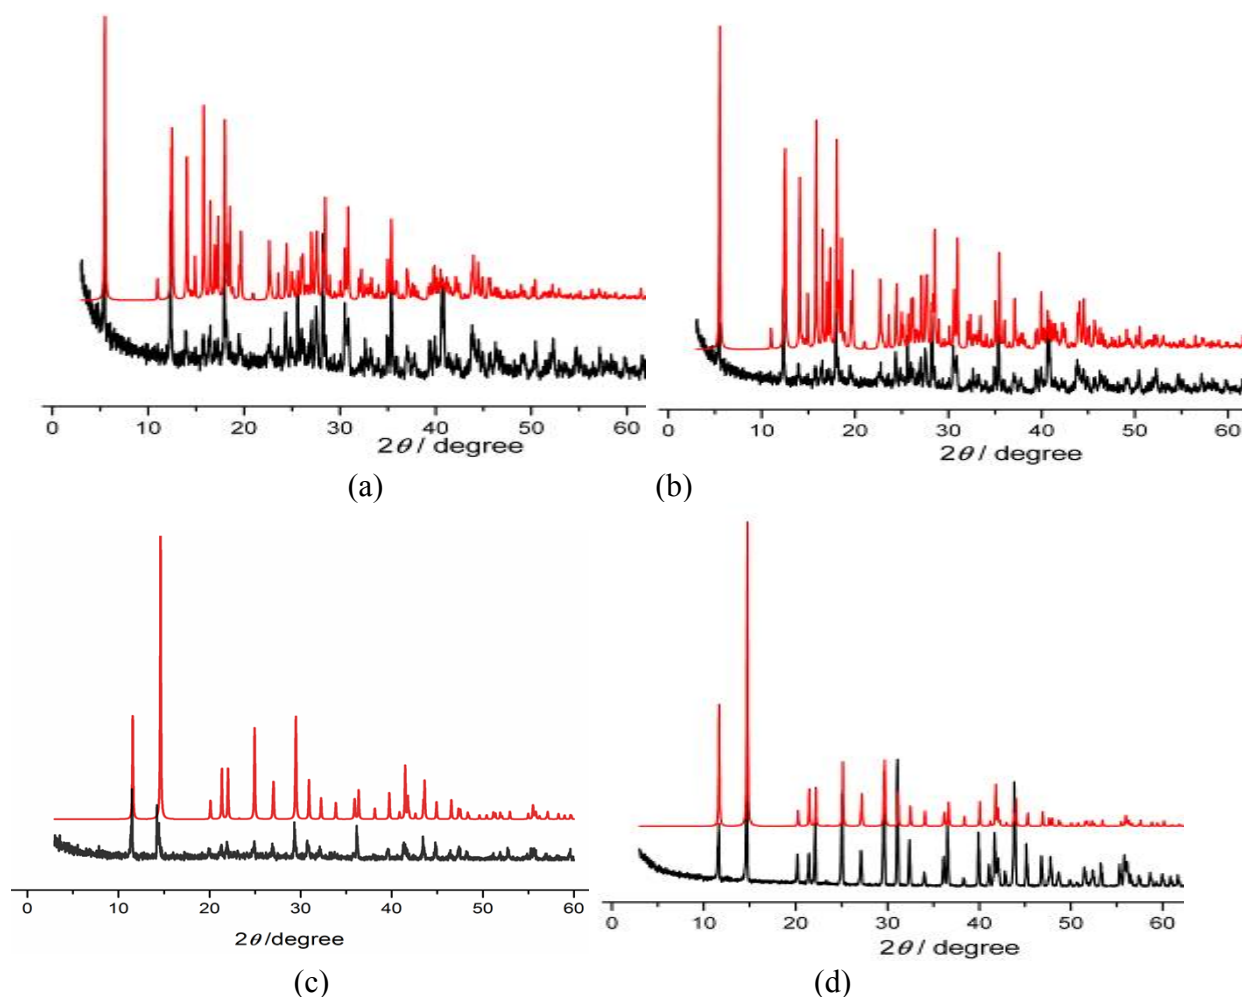

Fig. S1. Powder X-ray diffraction patterns of complexes **1-4**, corresponding to (a)-(d). Black color lines response the experimental data, red color lines response the simulated data.

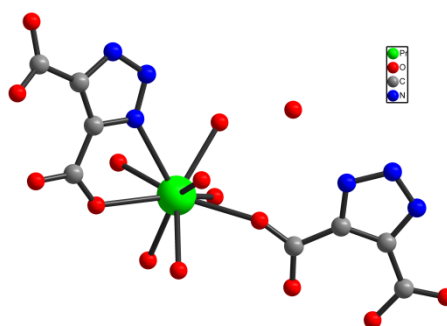

Fig. S2 The coordination environment of Pr<sup>III</sup> ion in **1**.

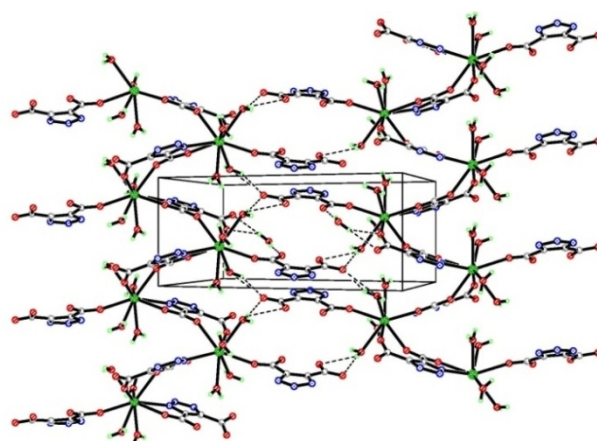

Fig. S3 Packing diagram of 1D chain showing hydrogen bonding interactions.

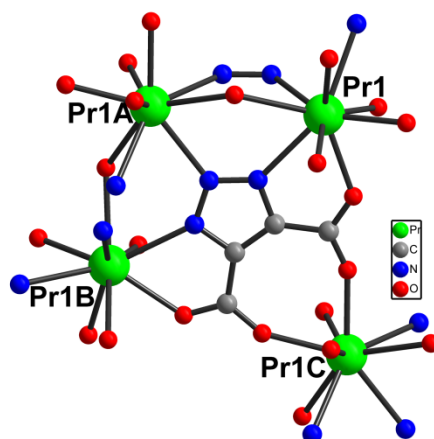

Fig. S4 The coordination environment of Pr<sup>III</sup> ions in **3**.

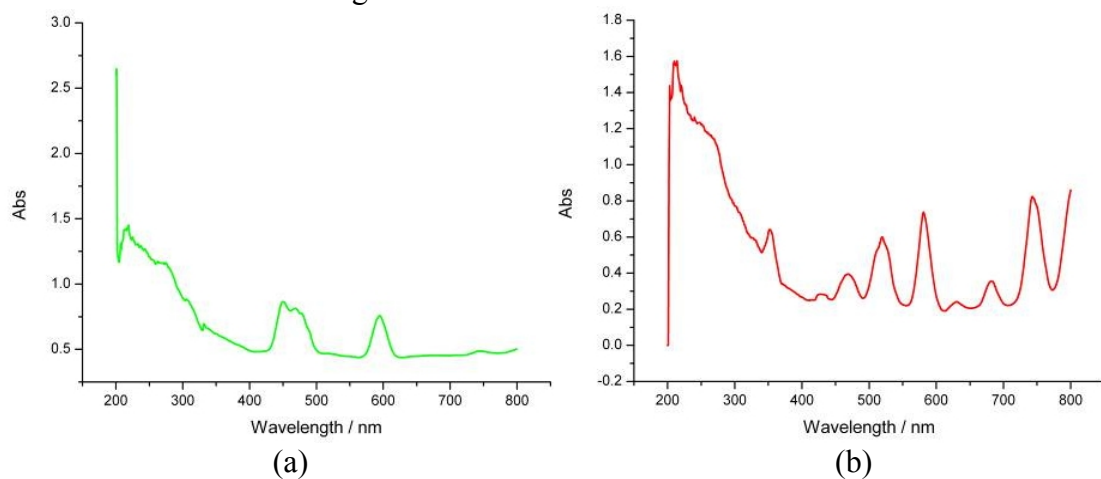

Fig. S5. The solid-state UV absorption spectrum of **3** (a) and **4** (b).

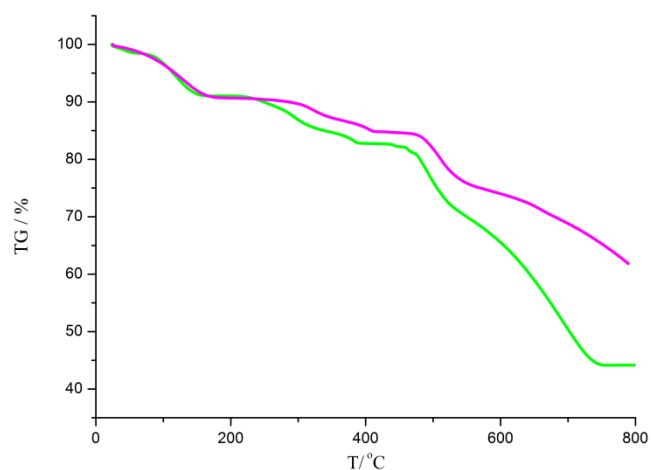

Fig. S6. TGA curves of **3** (green) and **4** (purple).

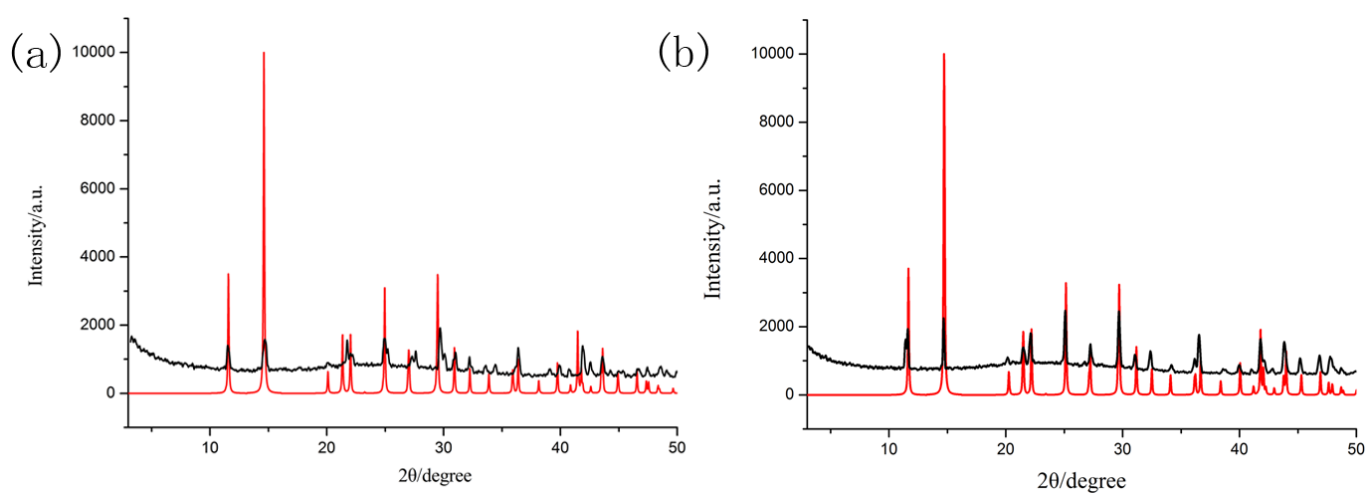

Fig. S7. Powder X-ray diffraction patterns of the activated complexes **3** (a) and **4** (b). Black color lines response the experimental data, red color lines response the simulated data.
